# Supplementary material for: Mechanistic understanding of N2 activation: a comparison of unsupported and supported Ru catalysts
Source: Royal Society of Chemistry journal article supplement (doi:10.1039/d2fd00172a), 2023-01-01
Supplement: d2fd00172a1.pdf [file d2fd00172a1.pdf]

## Supplementary Information

### Mechanistic understanding of N<sub>2</sub> activation: A comparison of unsupported and supported Ru catalysts

Yves Ira A. Reyes,<sup>a</sup> Kai-Shiang Yang<sup>a</sup>, Ho Viet Thang<sup>b</sup>, Carmine Coluccini<sup>c</sup>, Shih-Yuan Chen<sup>d</sup>, Hsin-Yi Tiffany Chen<sup>a,e,f</sup> \*

<sup>a</sup>Department of Engineering and System Science, National Tsing Hua University, Hsinchu, Taiwan

<sup>b</sup>The University of Danang, University of Science and Technology, 54 Nguyen Luong Bang, Danang 550000, Vietnam

<sup>c</sup>Institute of New Drug Development, China Medical University, No. 91 Hsueh-Shih Road, Taichung 40402, Taiwan

<sup>d</sup>National Institute of Advanced Industrial Science and Technology, Tsukuba, Ibaraki 305-8559, Japan.

<sup>e</sup>College of Semiconductor Research, National Tsing Hua University, 101, Sec. 2, Kuang-Fu Road, Hsinchu 300044, Taiwan

<sup>f</sup>Department of Material Science and Engineering, National Tsing Hua University, 101, Sec. 2, Kuang-Fu Road, Hsinchu 300044, Taiwan

**Table S1.** The Bader charges (in  $|e|$ ) of the Ru atoms and the MgO substrate of the Ru<sub>8</sub>(B5-like)/MgO(111) model catalyst before and after the adsorption of N<sub>2</sub> in the side-on configuration.

| Structure                                                                          | Atom No.                   | Bare         | Side-on N <sub>2</sub> * | Charge Difference |
|------------------------------------------------------------------------------------|----------------------------|--------------|--------------------------|-------------------|
| 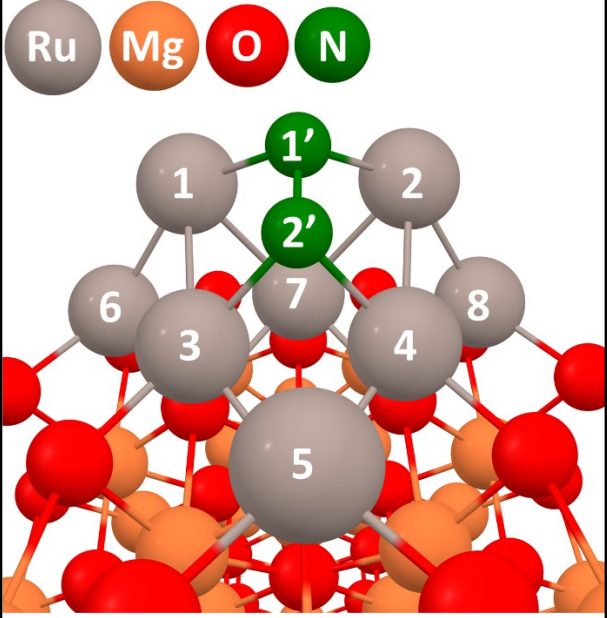 | Ru1                        | -0.05        | 0.20                     | 0.25              |
|                                                                                    | Ru2                        | -0.06        | 0.21                     | 0.27              |
|                                                                                    | Ru3                        | 0.64         | 0.87                     | 0.23              |
|                                                                                    | Ru4                        | 0.58         | 0.85                     | 0.28              |
|                                                                                    | Ru5                        | 1.04         | 1.21                     | 0.17              |
|                                                                                    | Ru6                        | 1.13         | 1.05                     | -0.08             |
|                                                                                    | Ru7                        | 0.71         | 0.69                     | -0.02             |
|                                                                                    | Ru8                        | 1.15         | 1.05                     | -0.10             |
|                                                                                    | <b>Ru Total</b>            | <b>5.13</b>  | <b>6.12</b>              | <b>0.99</b>       |
|                                                                                    | <b>N1'</b>                 | -            | -0.48                    | -0.48             |
|                                                                                    | <b>N2'</b>                 | -            | -0.55                    | -0.55             |
|                                                                                    | <b>N<sub>2</sub> Total</b> | -            | <b>-1.03</b>             | <b>-1.03</b>      |
|                                                                                    | <b>MgO</b>                 | <b>-5.13</b> | <b>-5.10</b>             | <b>0.04</b>       |

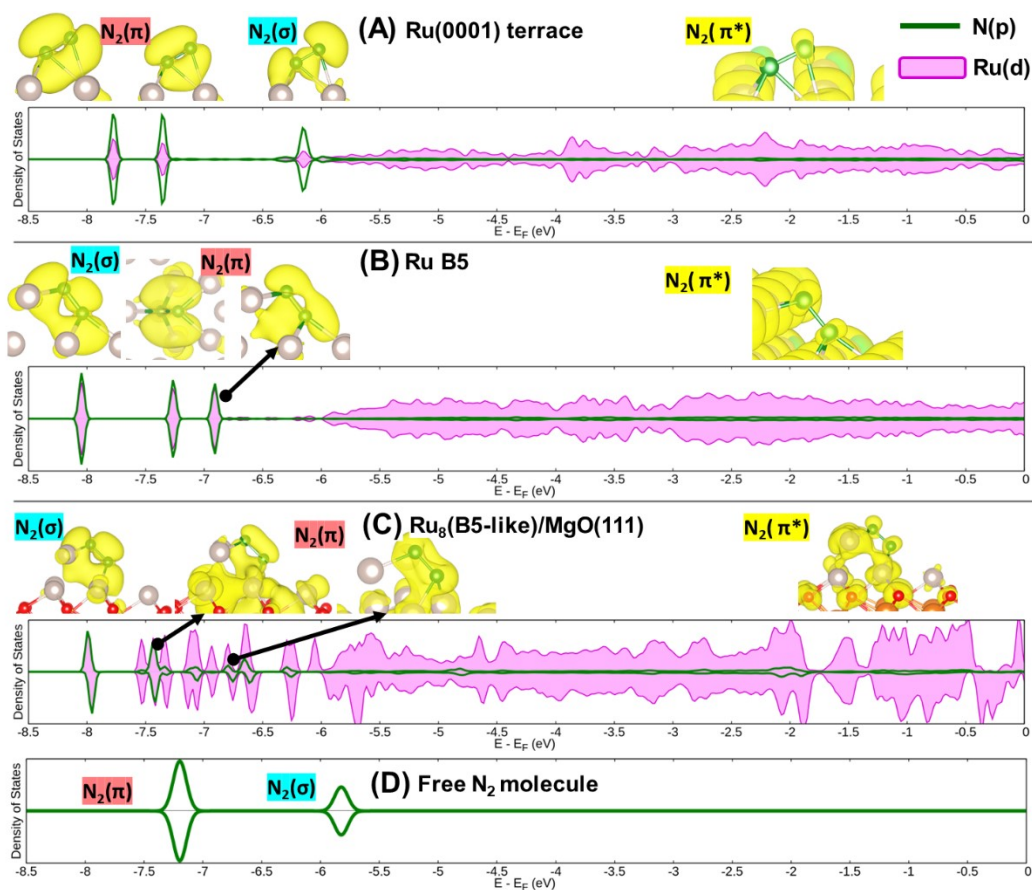

**Figure S1.** Plots depicting the partial density of states (PDOS), below Fermi energy, projected onto the p orbitals of the side-on  $N_2^*$  molecule, and the d orbitals of the Ru atoms bonded to  $N_2$ , on the (A) Ru (0001) terrace, (B) Ru B5, and (C)  $Ru_8$ (B5-like)/MgO(111) models. The plots of the partial charge density depict the electron density distribution corresponding to orbitals at different energy regions. The partial charge density are labelled as  $N_2(\sigma)$ ,  $N_2(\pi)$  or  $N_2(\pi^*)$  according to the shape of the  $N_2$  orbital that corresponds to that of the partial density plots.

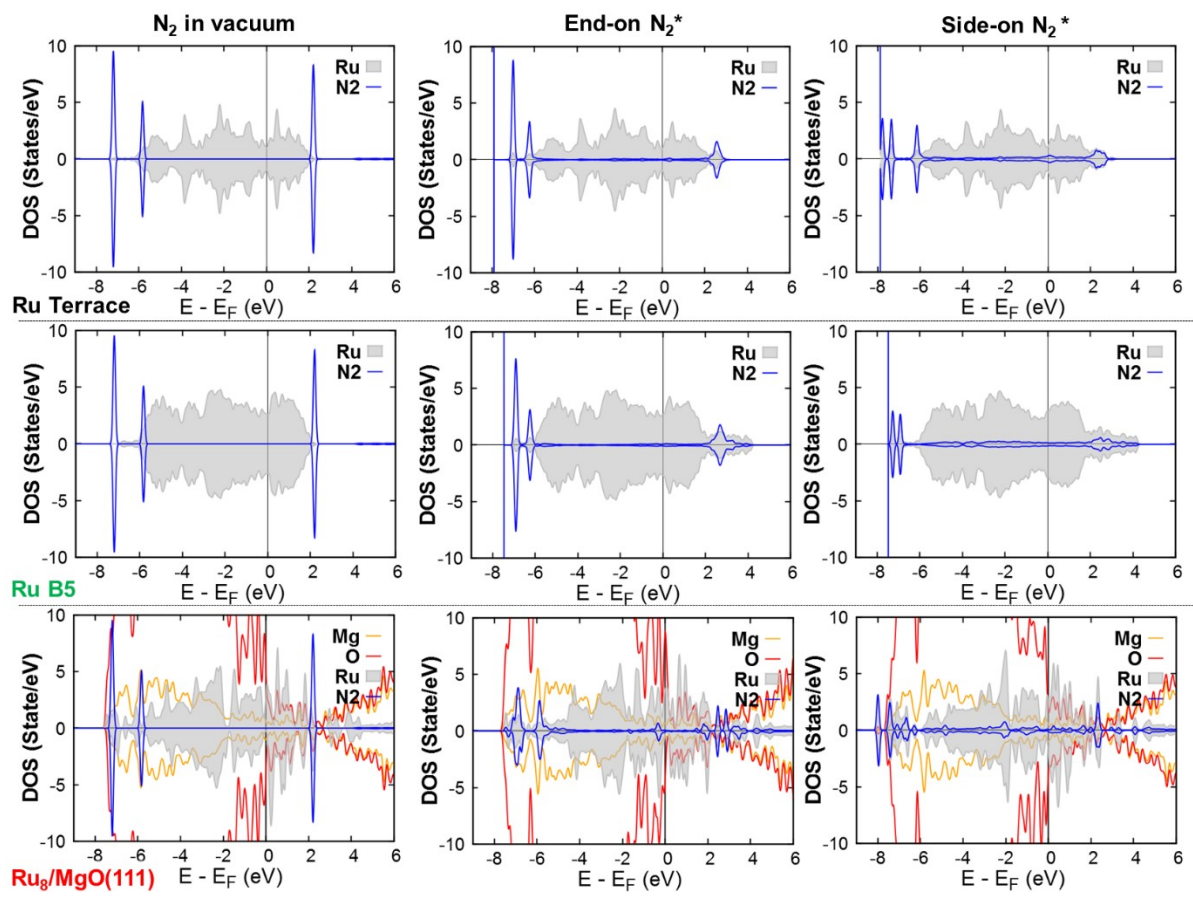

**Figure S2.** Partial density of states (PDOS) projected on Mg, O, Ru, and N (represented as the orange, red, grey, and blue lines, respectively). From left to right: free  $N_2$ , end-on  $N_2^*$  adsorption, and side-on  $N_2$  adsorption. From top to bottom: the Ru (0001) terrace, Ru B5, and  $Ru_8$ (B5-like)/MgO(111) models. Compared to side-on  $N_2^*$  adsorption, end-on  $N_2^*$  adsorption exhibits insignificant Ru-N coupling in the -4 to 0 eV region relative to the Fermi energy for all three systems.

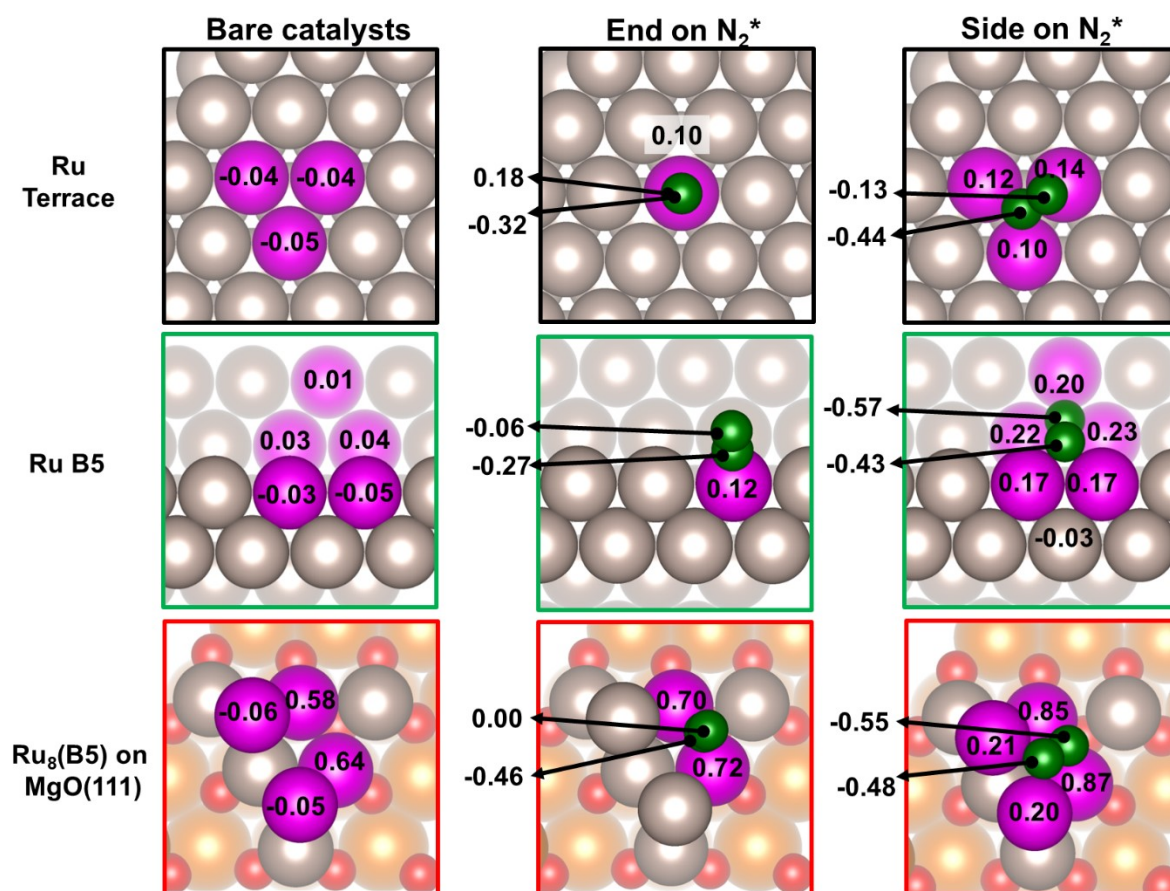

**Figure S3.** Optimised structures of the Ru(0001) terrace, Ru B5, and  $Ru_8(B5 \text{ like})/MgO(111)$  models in their bare form and with  $N_2^*$  adsorbed in both the end-on and side-on configurations. Green, magenta, grey, orange, and red spheres represent the N, Ru in contact with N, Ru not in contact with N, Mg, and O atoms, respectively. The black values refer to the corresponding Bader charges of the N atoms and the Ru atoms before and after  $N_2$  adsorption. The Bader charges of the N atoms are more negative in the side-on  $N_2^*$  configurations than in the end-on  $N_2^*$  configurations for all three systems; the most negative overall Bader charges of  $N_2$  are observed in the  $Ru_8(B5\text{-like})/MgO(111)$  system.
